# Supplementary material for: Serum microRNAs as potential new biomarkers for cisplatin resistance in gastric cancer patients
Source: PeerJ. 2020 Apr 14;8:e8943. doi: 10.7717/peerj.8943 (PMC7164432; doi:10.7717/peerj.8943)
Supplement: Supplemental Information 2 — Raw data: Expression levels and functions of 7 selected miRNAs in human GC cells and clinical specimens. (A) The relative level (fold change) of these seven selected miRNAs between DDP-resistant MGC803/DDP cells and parental MGC803 cells was analyzed via RT-qPCR. (B-E) The relative levels of miR-9-3p (B), miR-9-5p (C), miR-146a-5p (D), and miR-433-3p (E) between 34 chemotherapy response sensitive gastric cancer serums and 40 chemotherapy response resistant gastric cancer serums were significantly different, which were measured using RT-qPCR. Each assay was conducted in triplicate. [file peerj-08-8943-s002.xlsx]

## Sheet: Figure 4A
miR-9-3p	miR-9-5p	miR-146a-5p	miR-370-3p	miR-433-3p	miR-519a-5p	miR-522-5p
3.20408	4.88525	-4.35939	2.58988	2.88379	-5.10567	-5.10567
4.50146	3.47972	-3.97278	2.20732	2.99489	-5.7489	-5.7489
3.09593	2.39441	-3.65453	1.55451	3.42844	-4.78153	-4.78153

## Sheet: Figure 4B-E
number	Chemotherapy response	miR-9-3p	miR-9-5p	miR-146a-5p	miR-370-3p	miR-433-3p	miR-519a-5p/miR-522-5p
1	Resistant	1.08979	2.05299	-3.32235	1.96071	1.29	0.854598
2	Resistant	-0.0557307	-0.954554	1.21543	-0.0486605	-0.0192644	0.29673
8	Resistant	2.35298	2.33832	0.546345	0.858856	0.965857	-1.79062
10	Resistant	1.90959	1.8703	-1.26046	-1.66322	1.94192	-1.98091
11	Resistant	1.32929	1.31317	-4.29082	2.11884	0.780232	0.704005
13	Resistant	-0.99629	3.0177	-3.7613	2.91226	3.89514	-4.65754
14	Resistant	3.17691	1.20258	0.54951	-0.494413	-0.152843	0.103309
16	Resistant	1.39735	1.39751	-1.39027	3.2459	3.01409	0.0423388
18	Resistant	1.16849	1.6043	0.971273	0.371973	-0.1122	-2.01904
20	Resistant	-0.165613	5.59197	-1.49202	0.949106	0.220335	-1.80582
24	Resistant	3.29781	1.09282	-1.57992	1.57294	1.43492	0.456341
26	Resistant	-0.59199	-0.265843	-0.432633	0.157198	-0.504854	1.2155
28	Resistant	1.50783	-1.25109	0.167621	-0.765633	2.11591	-0.165613
29	Resistant	1.33268	-1.88676	-3.74785	1.17022	0.982142	3.29197
30	Resistant	-1.29729	-0.696132	0.156472	2.22628	1.77304	1.24965
33	Resistant	0.932892	0.576963	-2.92269	0.991417	0.350106	0.9949
34	Resistant	-0.708	1.39915	-1.7364	-0.076649	0.526263	1.35766
36	Resistant	0.766227	-0.831849	0.934764	-0.881675	-0.937319	2.24932
38	Resistant	1.76722	8.17474	0.654551	1.29584	1.75111	5.83579
40	Resistant	-1.24182	3.45431	0.0474767	2.72369	4.5311	-0.439023
42	Resistant	1.3649	-1.33595	-0.393152	-1.74158	1.62245	-0.974485
44	Resistant	2.59961	2.17549	-2.2352	2.55131	3.87837	-2.06476
45	Resistant	-0.201874	1.9902	0.427389	-0.471739	2.13792	-1.60972
46	Resistant	-0.215204	-1.52604	-0.116936	-0.821186	-0.846054	-0.604988
48	Resistant	-1.64821	-0.853715	0.428285	-0.992934	-0.682536	-0.560074
49	Resistant	-1.61205	-1.05453	-0.420374	0.782764	-0.346395	-0.792378
50	Resistant	2.84603	6.24143	-2.61576	-1.21774	1.0128	-1.43871
52	Resistant	1.7851	2.73317	-1.48274	-0.966111	-0.939982	-1.31956
53	Resistant	3.92422	4.1119	-4.86298	3.45515	3.34982	3.3344
55	Resistant	-0.451077	-1.31487	-2.24557	0.479006	-1.01286	-1.24444
56	Resistant	1.76705	4.58376	-0.0318098	-2.0825	2.45404	-0.728318
58	Resistant	0.390512	1.65294	0.076649	-1.57711	0.141182	1.22508
60	Resistant	-0.633657	5.23372	0.610304	-0.672142	-0.954912	-0.302141
63	Resistant	0.228295	0.665367	1.44383	-0.797351	-1.25475	-0.0704891
64	Resistant	0.365653	0.849809	-0.619782	0.168183	-1.2426	0.654523
66	Resistant	4.60858	6.75793	-0.751725	2.22003	3.28683	10.7113
68	Resistant	3.85742	4.49119	-1.70895	3.94862	1.94788	10.4544
70	Resistant	3.89845	5.46811	0.609318	2.27038	1.68115	10.6613
71	Resistant	2.83035	-1.23556	-1.12831	-0.211933	1.71399	8.32818
72	Resistant	4.52432	5.97661	-0.395742	0.71551	3.28274	10.6098
3	Sensitive	-2.21018	-0.0852935	3.02507	-0.59577	-1.00326	-0.554195
4	Sensitive	-1.84649	1.8847	-0.217171	-2.01725	-1.97171	-1.81303
5	Sensitive	1.05365	-3.09421	2.62638	2.06649	-0.792959	2.21018
6	Sensitive	-1.22758	-3.31523	1.83891	1.47389	0.841673	2.97176
7	Sensitive	-2.76803	-2.80047	-0.59577	1.21032	0.676012	-2.79333
9	Sensitive	1.01106	-1.00326	2.62158	2.02395	-1.10394	0.352082
12	Sensitive	0.820391	-0.789425	1.17973	-0.797371	-1.49466	-0.858022
15	Sensitive	-4.49035	-4.53727	3.53603	1.87527	-2.74839	-6.43301
17	Sensitive	-5.37133	-5.85423	2.27016	-3.06434	-4.18982	-6.80953
19	Sensitive	-5.38274	-3.02179	2.92931	-3.66711	-5.03719	-7.77622
21	Sensitive	-0.888445	1.30948	4.34605	-0.270048	-1.34844	-1.54956
22	Sensitive	-5.28561	-4.91166	0.866601	-5.13748	-4.70041	5.21216
23	Sensitive	0.0177169	-2.23436	3.89862	-0.94063	-1.71996	-3.41141
25	Sensitive	-4.31751	-4.03844	3.19675	-2.80179	-4.10516	-4.31317
27	Sensitive	-1.2155	-1.42516	3.85236	2.72422	0.732634	1.97006
31	Sensitive	0.649143	-0.194135	0.660101	2.06956	0.648268	-0.504034
32	Sensitive	-1.02836	0.526263	-0.680514	0.923825	0.143842	-0.295592
35	Sensitive	-1.79189	-4.77335	-0.661951	-0.909918	-2.29559	-0.896454
37	Sensitive	0.0927578	-2.45319	-1.36761	0.387903	0.20187	3.57368
39	Sensitive	0.259572	-1.94192	2.51027	-0.455777	0.0955035	0.474715
41	Sensitive	-1.93341	-1.95154	-0.000257084	-1.54357	-2.06575	-2.13065
43	Sensitive	-1.63338	1.25634	-0.307567	-0.818557	-0.786925	-1.68618
47	Sensitive	0.498829	-2.24624	3.53673	1.92063	-1.58972	0.999314
51	Sensitive	-1.58971	1.88148	-0.325944	-0.00419341	-0.619376	-1.71182
54	Sensitive	1.07178	0.306544	-1.04914	-0.163818	0.372161	1.06962
57	Sensitive	0.0152357	1.20011	0.479006	-1.21634	0.139353	0.231682
59	Sensitive	-1.24444	-2.1589	-1.527	-1.78371	-2.0078	-2.76789
61	Sensitive	0.475807	-2.43229	3.44077	1.59248	-1.36138	1.58095
62	Sensitive	-2.00356	1.36138	1.66322	-1.65342	-2.2432	-0.31077
65	Sensitive	-3.26637	-4.1641	7.66527	-4.88839	-4.46291	2.24867
67	Sensitive	-2.28691	-2.87359	1.09984	3.14463	0.502577	8.29622
69	Sensitive	2.15021	-3.67279	-0.177517	1.28867	1.05813	8.32541
73	Sensitive	0.711054	1.09032	2.6828	-1.81487	0.884661	8.26221
74	Sensitive	-2.70361	-6.12996	-1.65165	-0.588836	-1.78268	10.8424
