# Supplementary material for: Serum microRNAs as potential new biomarkers for cisplatin resistance in gastric cancer patients
Source: PeerJ. 2020 Apr 14;8:e8943. doi: 10.7717/peerj.8943 (PMC7164432; doi:10.7717/peerj.8943)
Supplement: Supplemental Information 3 [file peerj-08-8943-s003.xlsx]

## Sheet: Sheet1
			The common target genes among four different databases of the 7 miRNAs shown in Figure 3.
			miR-9-3p	miR-9-5p				miR-146a-5p	miR-370-3p	miR-433-3p	miR-519a-5p	miR-522-5p
			ACTBL2	ETS1	PNRC2	FERMT1	ZBED3	COPS8	RETSAT	CHD9	CBX4	BEND4
			KIAA0408	COL12A1	MTHFD2	POU2F2	ATXN7	CARD10	PRPF38A	KRAS	TEF	TEF
			PCMTD1	GPBP1L1	LMNA	UBE4B	DICER1	ZNF117	NF1	COX6B1	SLC31A1	ATP11A
			CREBRF	EOGT	PI4K2A	SERINC5	CD34	GPM6B	PARVB	NINJ1	TJAP1	CBX4
			IGF2	AUH	BACE1	SYAP1	KIF1C	IFIT3	TGFBR2	MAFK	CDC5L	SLC31A1
			CRK	ZNF557	TBPL1	TGFBR2	PTPRK	TRAF6	RAB7A	MRPS25	BEND4	CDC5L
			MTRNR2L6	ESR1	KCNJ2	SLC39A14	CHSY1	ARL8A	KCTD15	HIVEP1	ATP11A	TJAP1
			SEC24A	BCL6	SEC23IP	DRD2	NCOR2	RHOBTB3	RAD54L2	WDR45B
			ITPRIPL2	ATP7A	IGF2R	REST	MYLK	CCDC6	CANX	AZIN1
			YOD1	CCNDBP1	PPP4R2	MAP1B	PRRX1	METTL7A	BAG4	MAPK8
			RCOR1	TGFBI	FBN2	PXDN	CPEB4	ELAVL1	HSP90AB1	LRIG3
			TPD52	PPARA	PRDM1	OPTN	ELAVL1	RAC1	DHX33	BRWD1
			KLHL15	LHFPL2	SOCS5	ATP11C	HIST1H2AE	IRAK1	MGMT	GRB2
			REST	FOXO1	ID4	SIRT1	CPA4	PTGS2	LIN28A	UGT2B4
			ITGB1	EN2	AMOTL1	BCL2L11	SLC19A3	AVL9	ARID3B	STK38
			FBXO28	KLF5	AP3B1	STK3	MDM4	UMPS	FOXO1
			ELOVL5	RAB34	CAPZA1	NR2E1	EDEM3	NUMB	KIAA0355
			ZNF148	COLEC12	MAP3K3	MYH9	PRKD3	CFH	HMGA2
			GXYLT1	SLC35B3	CCNG1	FLNB	STMN1	ROBO1	TNRC6B
			SLC38A2	SDC1	P4HA2	CXCR4	FOXP1	PPP1R11	CYB561D1
			CAPZA1	CHMP2B	SYNGR2	ZNF407	TC2N	SHCBP1	NFASC
			NHS	SNX7	POU2F1	ONECUT2	SPAG9	ERBB4	DCK
			GPR180	TRPM7	ANP32B	ZFAND1	PRTG	PRKCE
			B4GALT6	NFATC3	EFNA1	TESK2	FOXO3	CCL5
			PKD2L2	RYBP	PIGM	FNBP1	TRIM14	CCR9
				LDLRAP1	SRF	UHMK1	PCMTD2	PMAIP1
